# Supplementary material for: Modified QuEChERS Based on Mixed Adsorbent Cleanup of Mycotoxins in Corn
Source: Hindawi journal article supplement (doi:10.1155/2020/2047649), 2020-05-20
Supplement: f1 [file 2047649.f1.pdf]

## Supplementary data

**Suppl. Table 1** The list of apparatus.

**Suppl. Fig. 1** Effect of the type of extraction solvent on recoveries. The volume of extraction-solvent, 6 mL; ultrasonic extraction time, 5 min; the type of adsorbent, diatomaceous earth + PSA (1:1); the volume of adsorbent, 80 mg.

**Suppl. Fig. 2** Effect of ultrasonic extraction time on the recoveries of the analytes. The type of extraction solvent, ethyl acetate and n-hexane (EA / HA, V: V = 1: 1) ; the volume of extraction-solvent, 6 mL; the type of adsorbent, diatomaceous earth + PSA (1:1); the volume of adsorbent, 80 mg.

**Suppl. Fig. 3** Effect of type of adsorbent on recoveries of analytes. The type of extraction solvent, ethyl acetate and n-hexane (EA / HA, V: V = 1: 1) ; the volume of extraction solvent, 6 mL; ultrasonic extraction time, 5 min; the volume of adsorbent, 80 mg.

**Suppl. Fig. 4** Effect of amount of adsorbent on the recoveries of the analytes. The type of extraction-solvent, ethyl acetate and n-hexane (EA / HA, V: V = 1: 1) ; the volume of extraction-solvent, 6 mL; ultrasonic extraction time, 5 min; the type of adsorbent, diatomaceous earth + PSA (1:1).

**Suppl. Table 1** The list of apparatus

| <b>Apparatus name</b>                                       | <b>Model</b>               | <b>Manufacturer</b>                                   |
|-------------------------------------------------------------|----------------------------|-------------------------------------------------------|
| High performance liquid chromatograph--Diode Array Detector | 1260                       | Agilent Technologies Inc., USA                        |
| High-speed refrigerated centrifuge                          | Allegra 64R                | Beckman, USA                                          |
| Philips mill                                                | HR-2870                    | Philips, Zhuhai, China                                |
| vacuum rotatory evaporator                                  | RE-52AA                    | Yarong, Shanghai, China                               |
| water purification system                                   | Milli-Q                    | Millipore Corp., USA                                  |
| ultrasonic water bath cleaner                               | KQ2200E                    | Kunshan Instrument Equipment Co., Ltd., Kunshan, Chin |
| Eclipse XDB-C18 column                                      | 150 mm×4.6 mm i.d., 3.5 μm | Agilent, USA                                          |

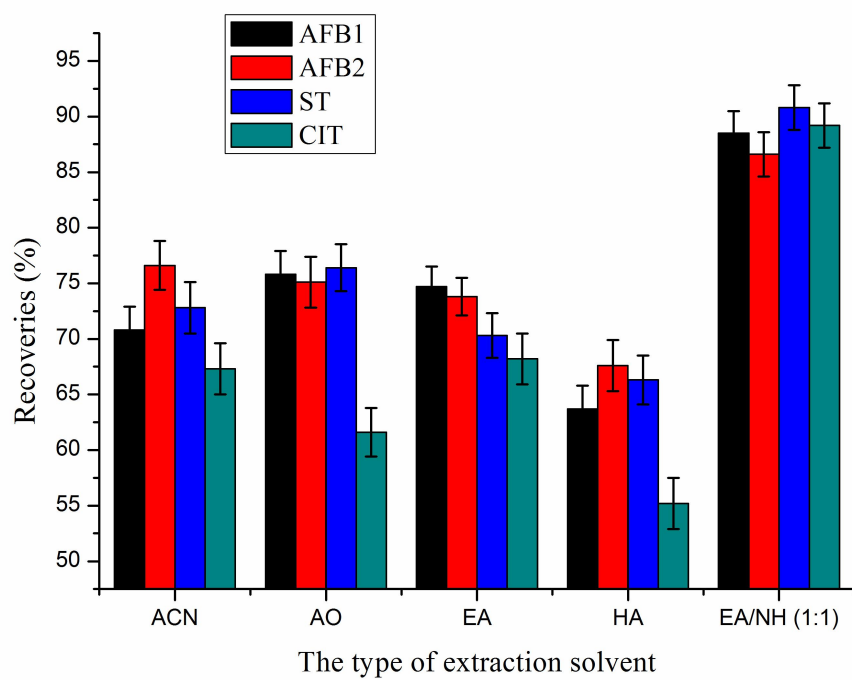

**Suppl. Fig. 1** Effect of the type of extract solvent on on the recoveries of the analytes

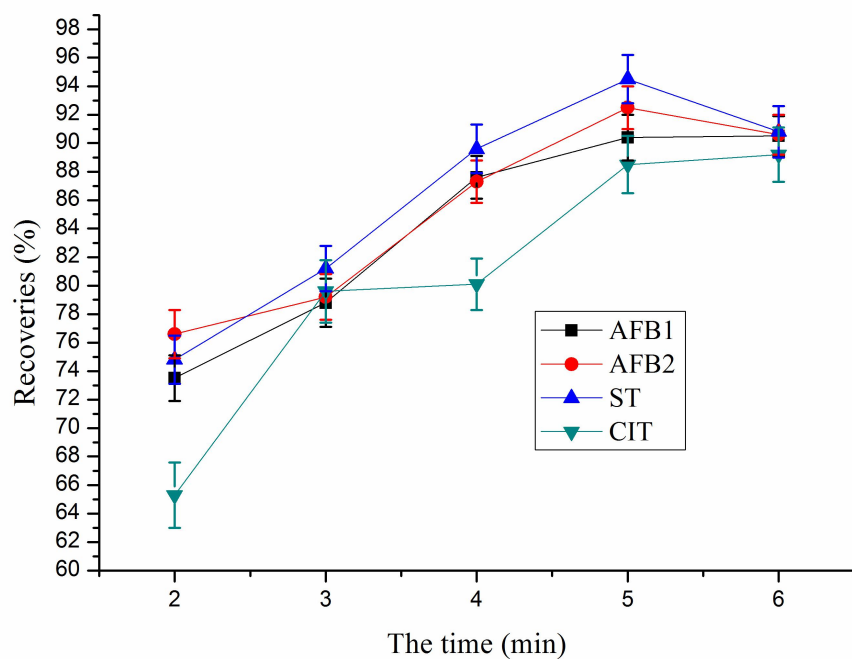

**Suppl. Fig. 2** Effect of ultrasonic extraction time on the recoveries of the analytes

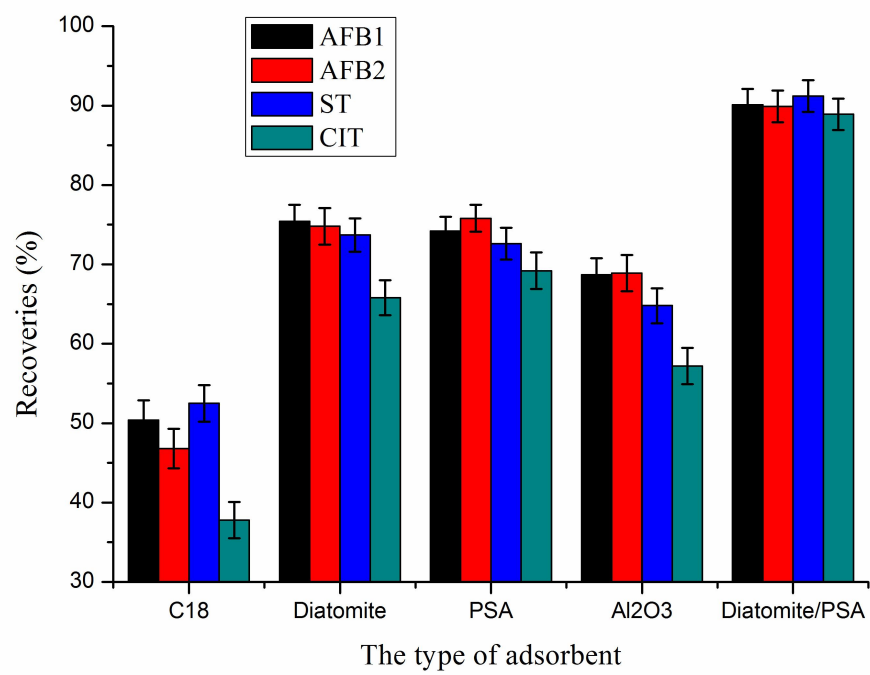

46

47

**Suppl. Fig. 3** Effect of type of adsorbent on recoveries of analytes

48

49

50

51

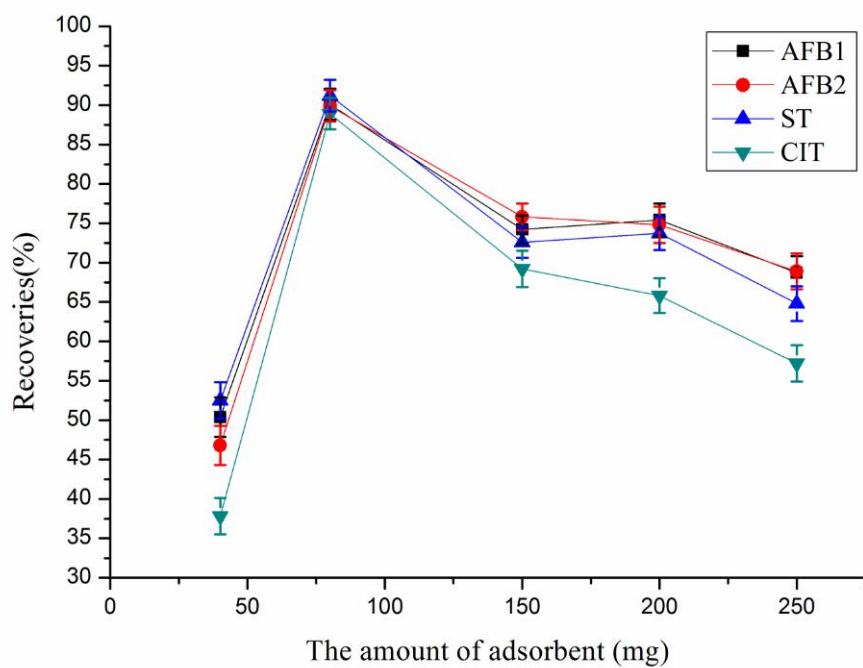

**Suppl. Fig. 4** Effect of ~~volume~~amount of adsorbent on the recoveries of the analytes
